# Supplementary material for: Population Pharmacokinetics of Meropenem in Critically Ill Korean Patients and Effects of Extracorporeal Membrane Oxygenation
Source: MDPI journal article supplement (doi:10.3390/pharmaceutics13111861), 2021-11-04
Supplement: s1 [file s1]

# Population Pharmacokinetics of Meropenem in Critically Ill Korean Patients and Effects of Extracorporeal Membrane Oxygenation

Dong-Hwan Lee, Hyoung Soo Kim, Sunghoon Park, Hwan-il Kim, Sun Hee Lee and Yong Kyun Kim

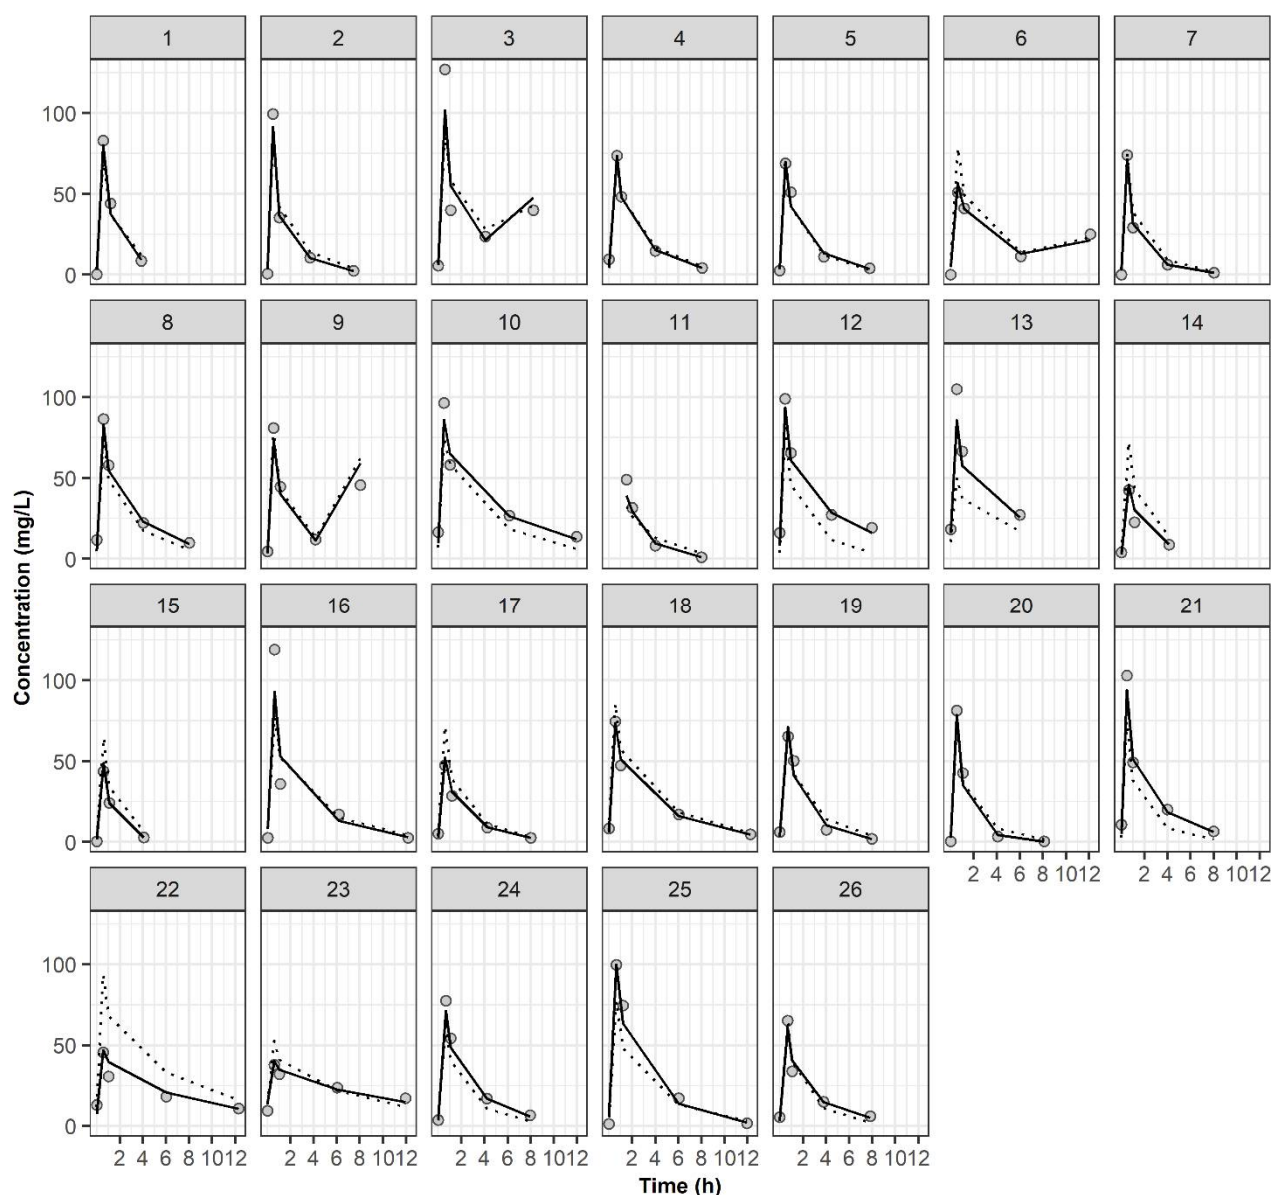

**Figure S1.** Individual fit plots. Closed circle, observed concentration; solid line, individual-predicted concentrations; dotted line, population-predicted concentrations.

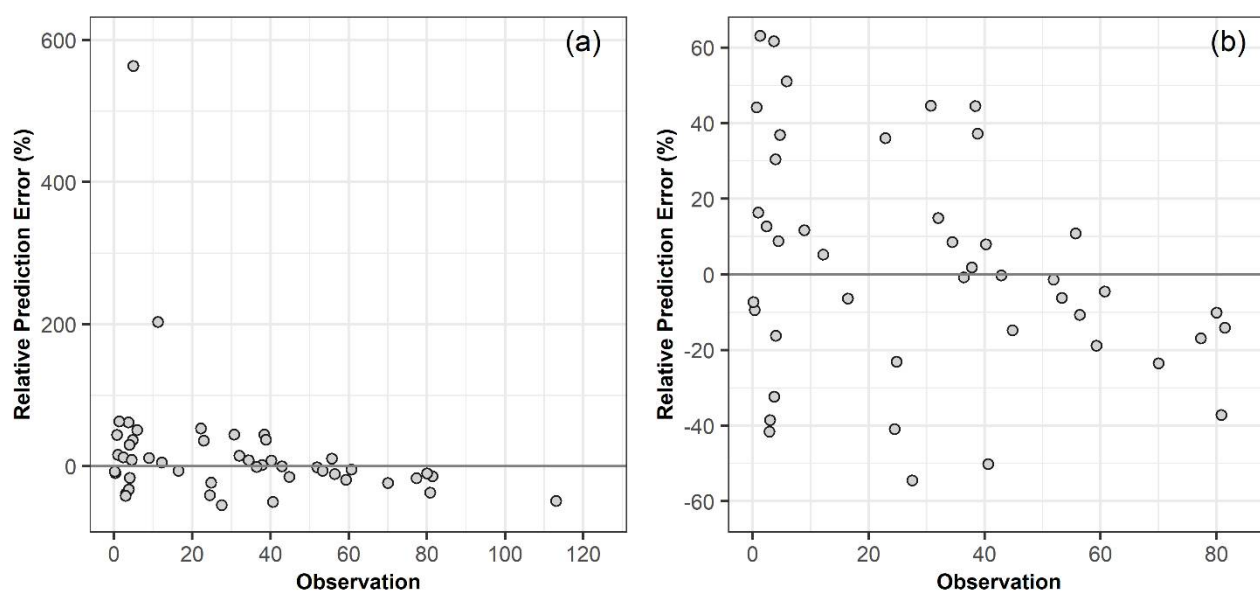

**Figure S2.** Relative prediction errors vs observations for the final population pharmacokinetic model of meropenem: (a) plots for all subjects ( $n = 26$ ), (b) plots excluding the two patients with extreme values ( $n = 24$ ).
